# Supplementary material for: Single cell RNA-seq analysis identifies a noncoding RNA mediating resistance to sorafenib treatment in HCC
Source: PubMed Central journal article supplement (PMC8722008; doi:10.1186/s12943-021-01473-w), 2022-01-03

# Supplementary Figure 1

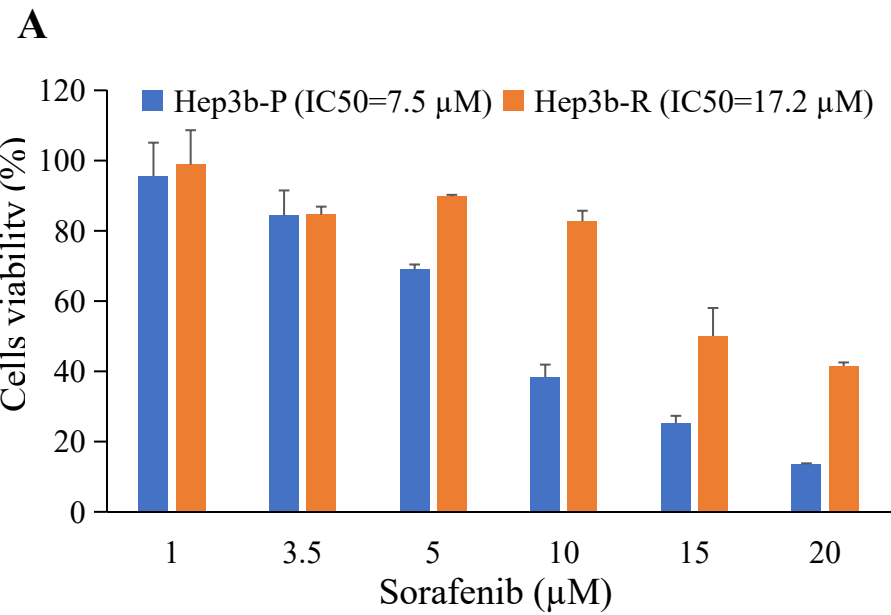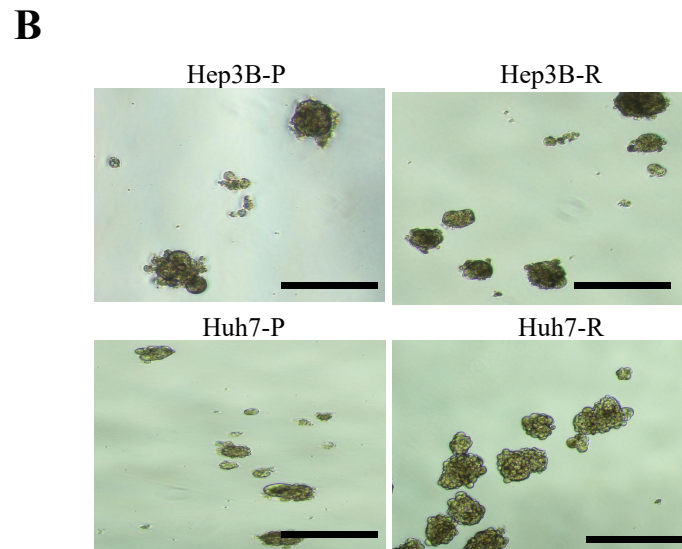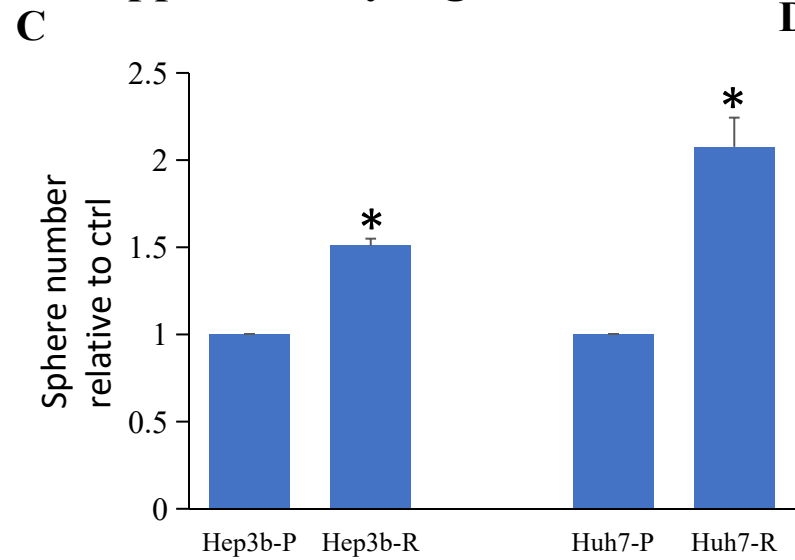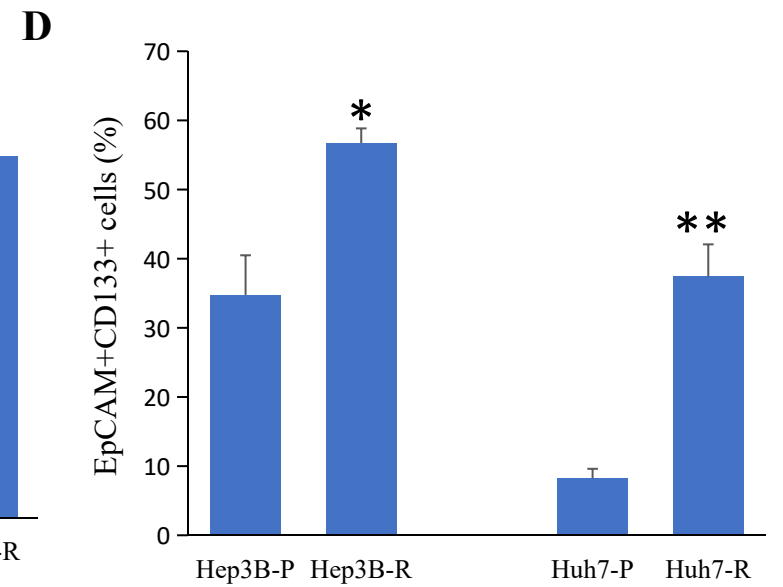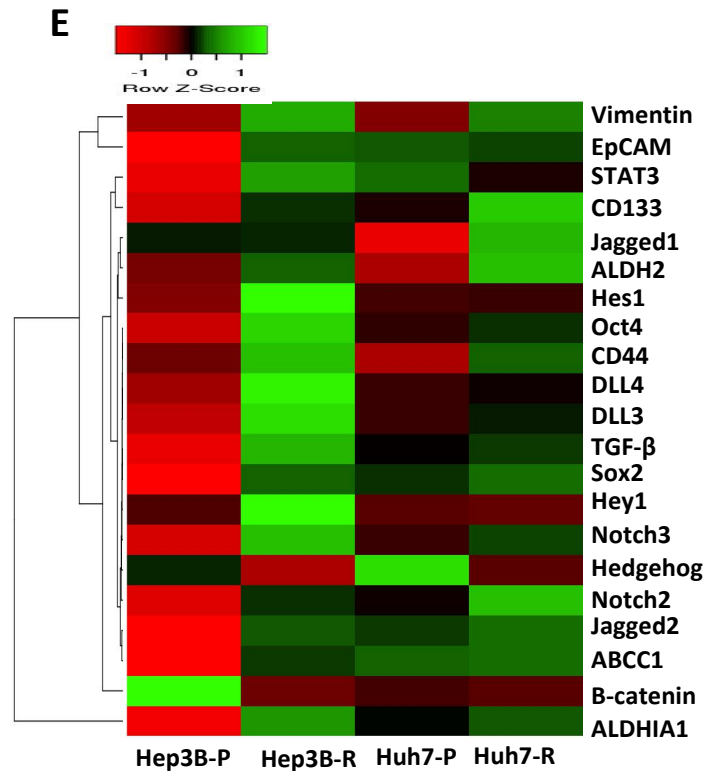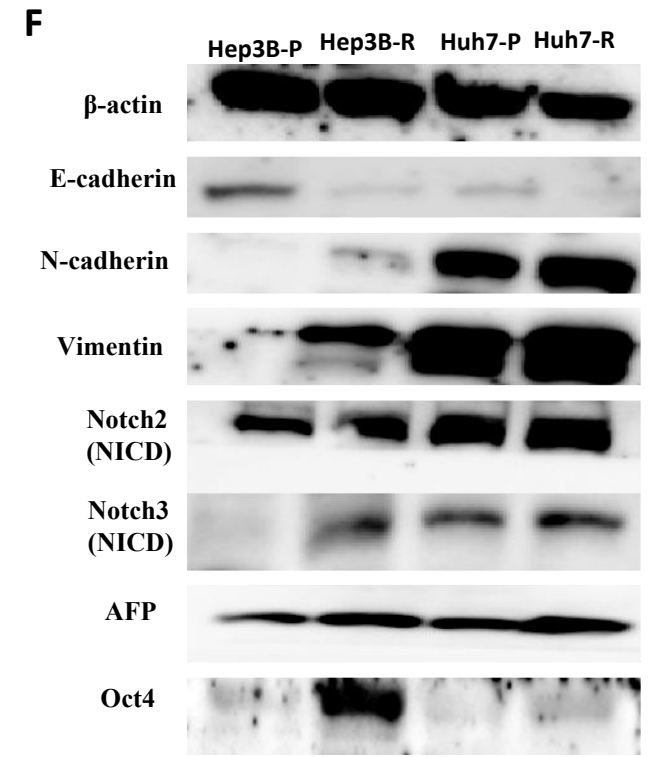

## Supplementary Figure 2

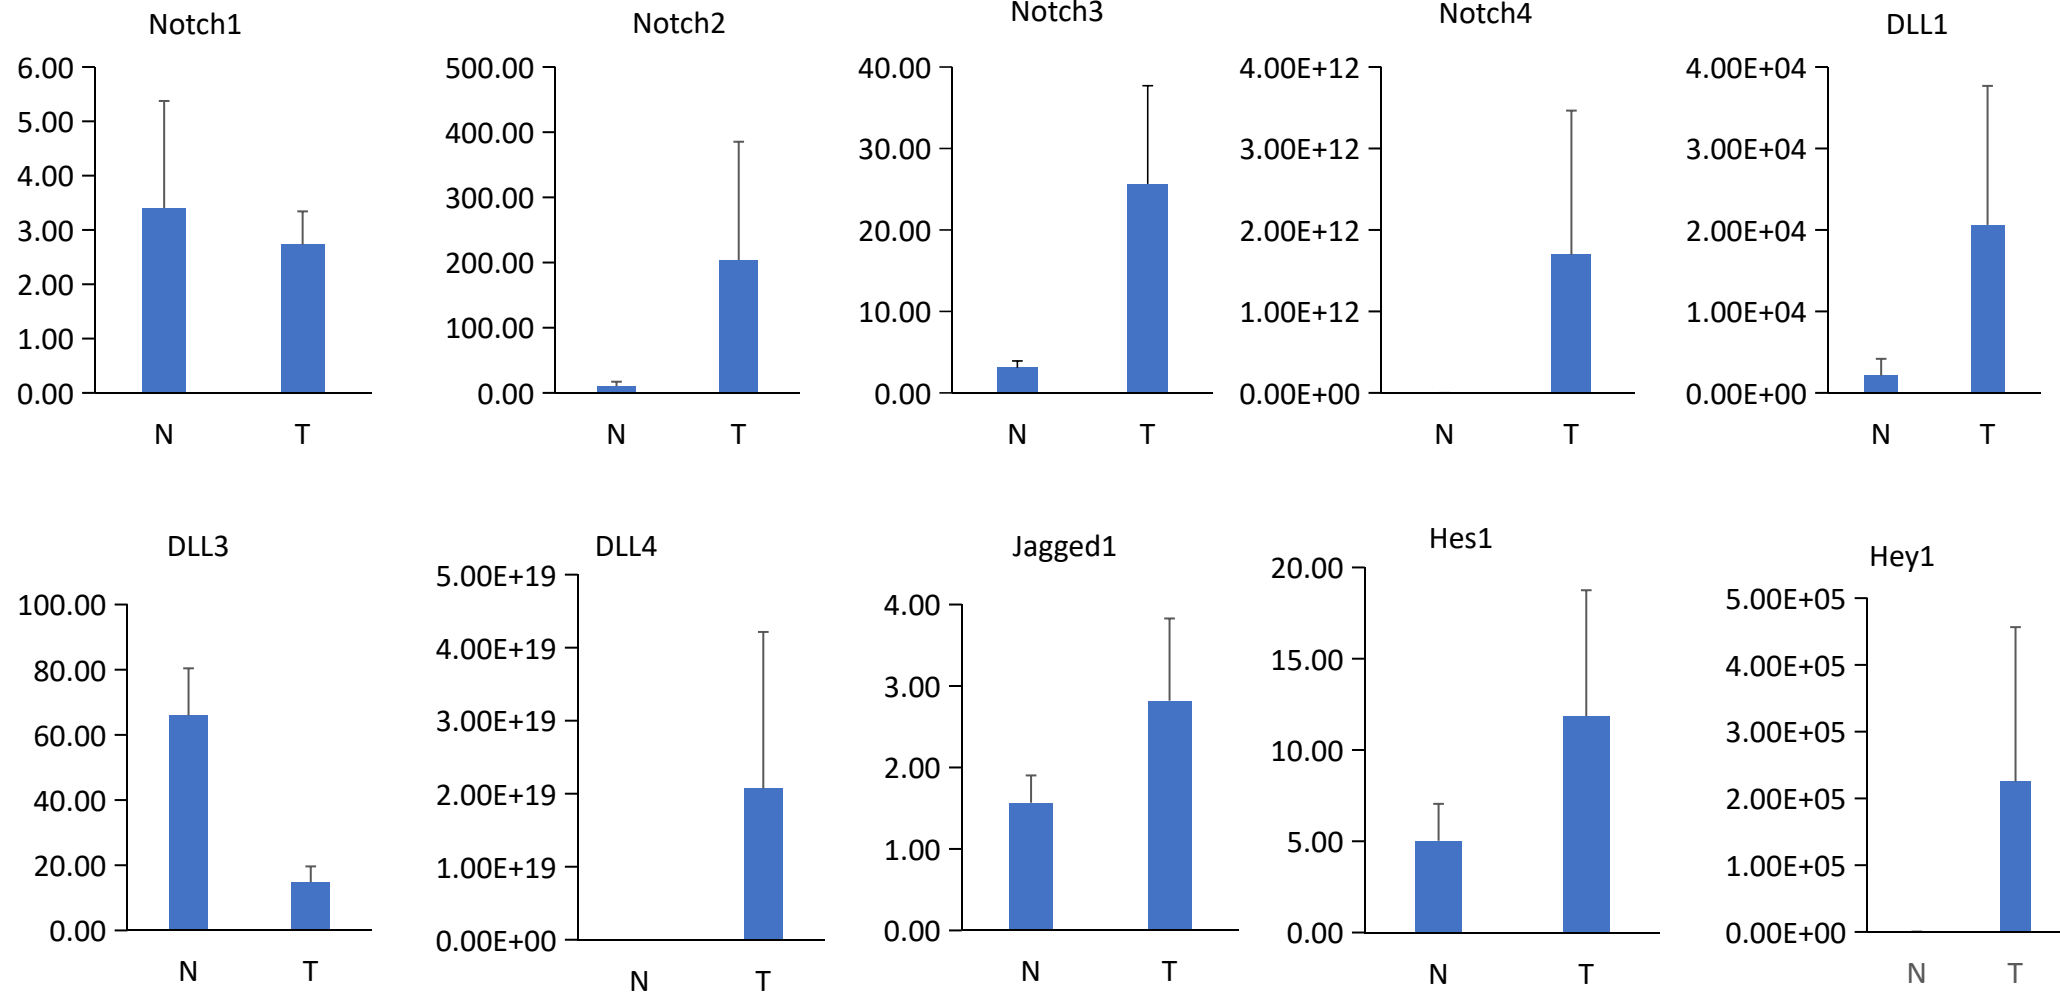

# Supplementary Figure 3

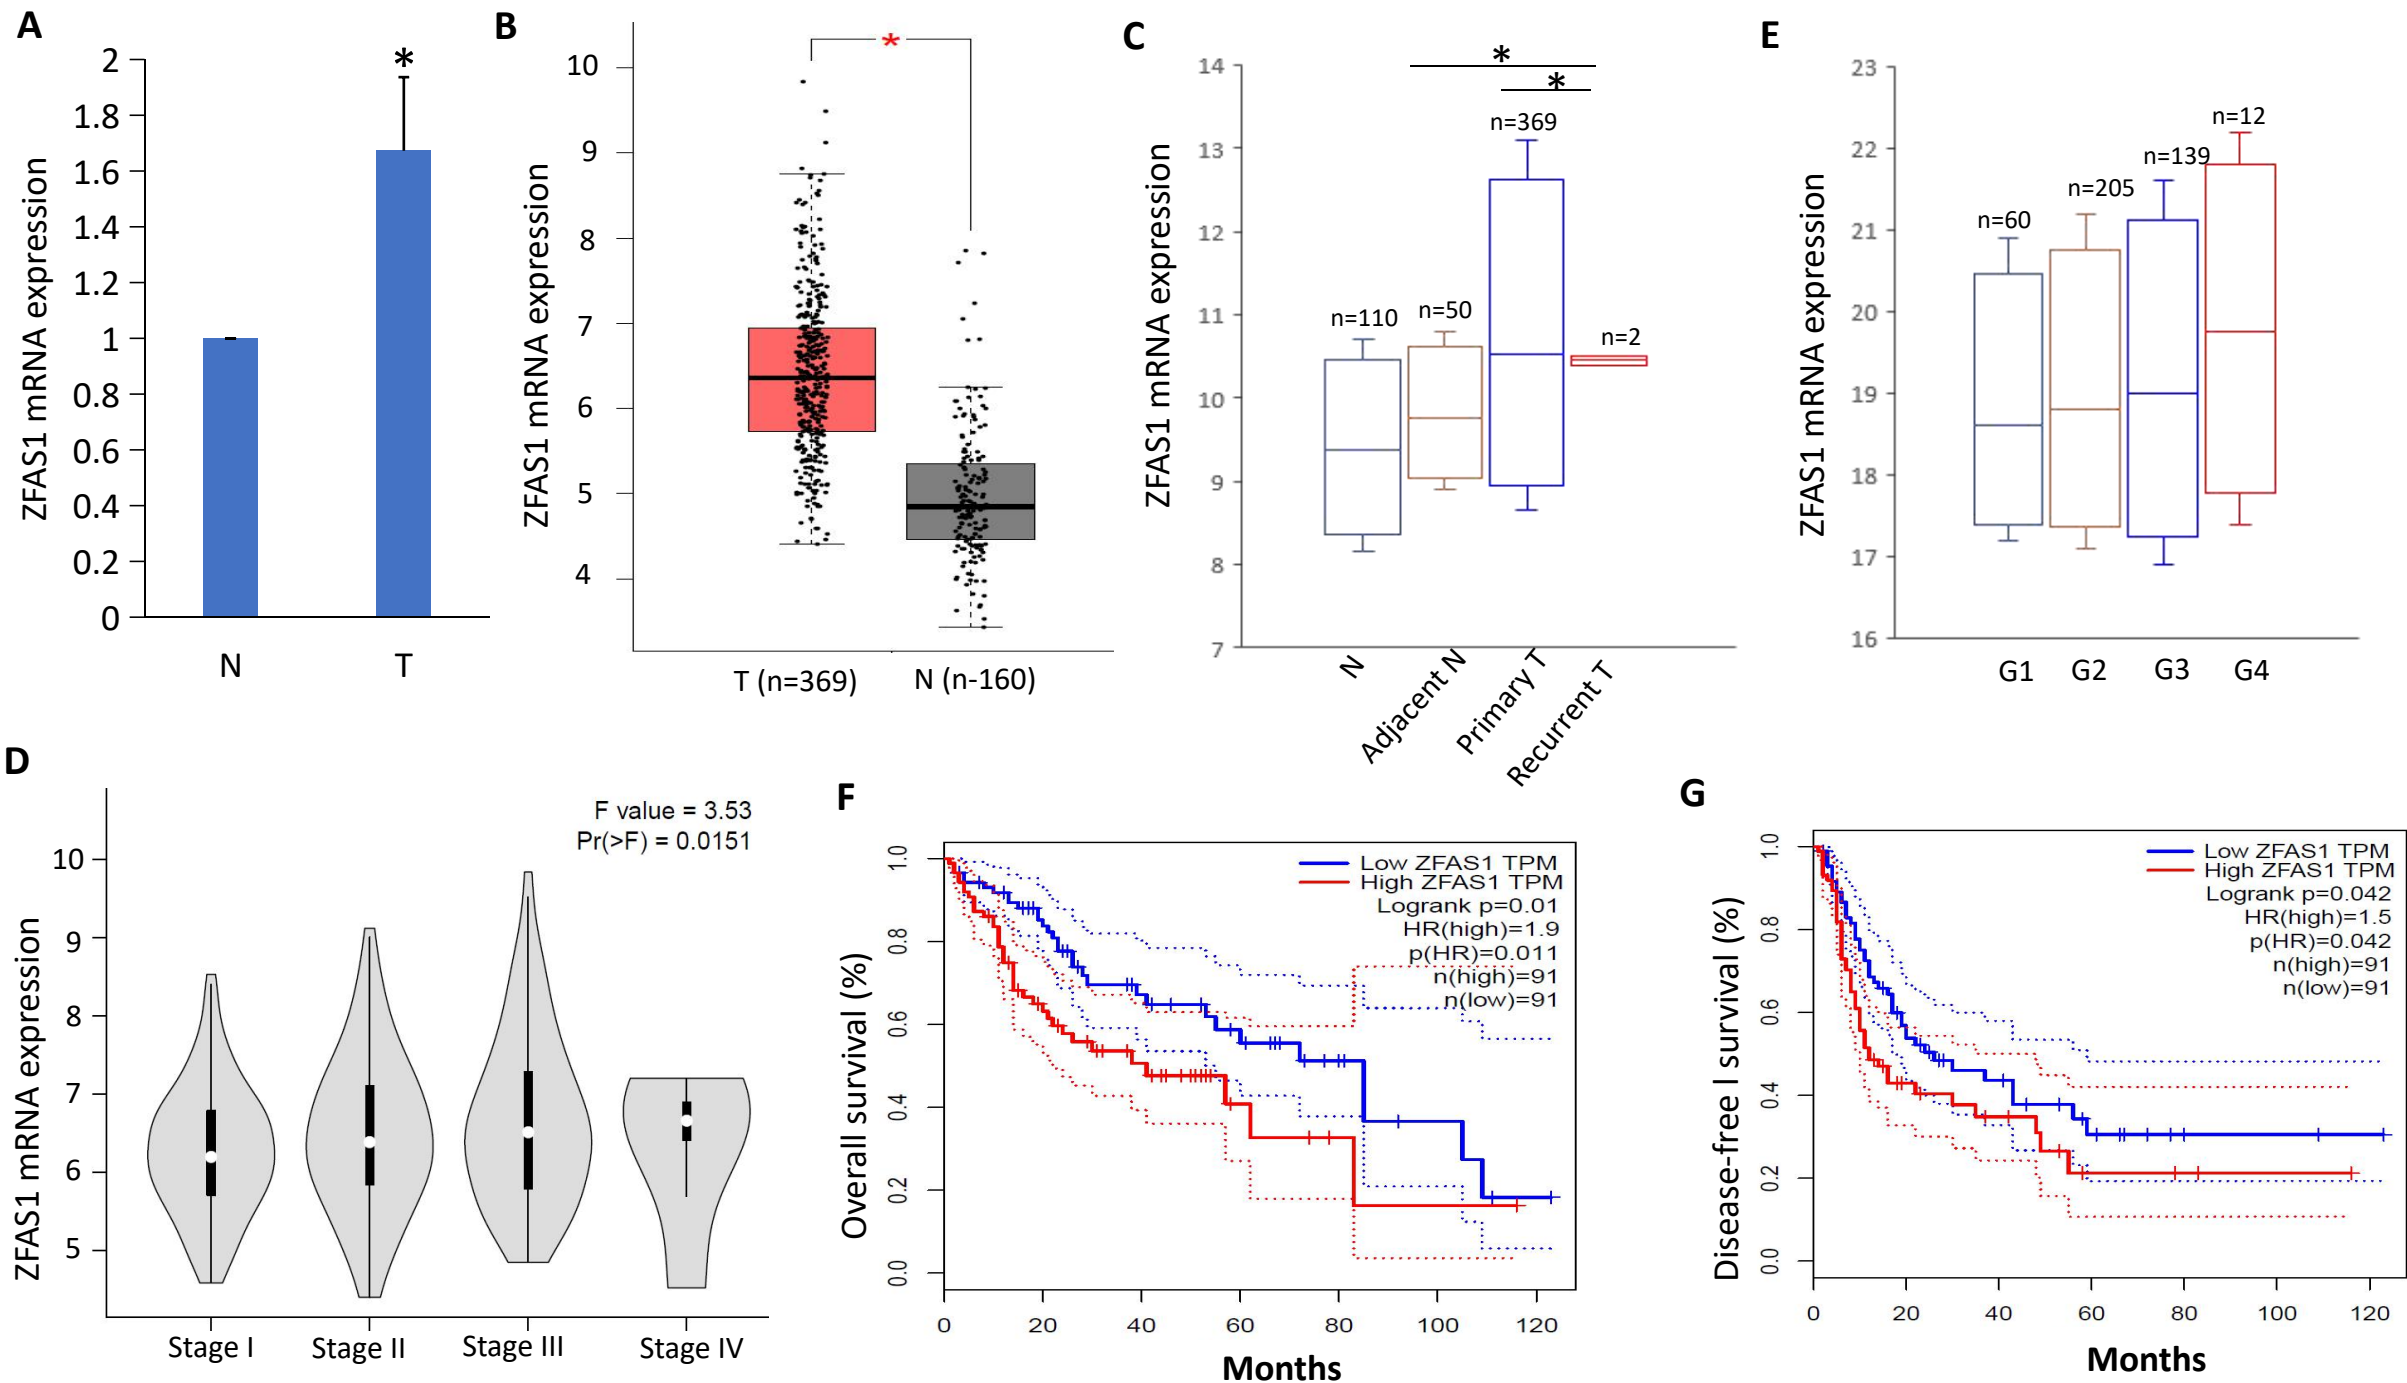

# Supplementary Figure 4

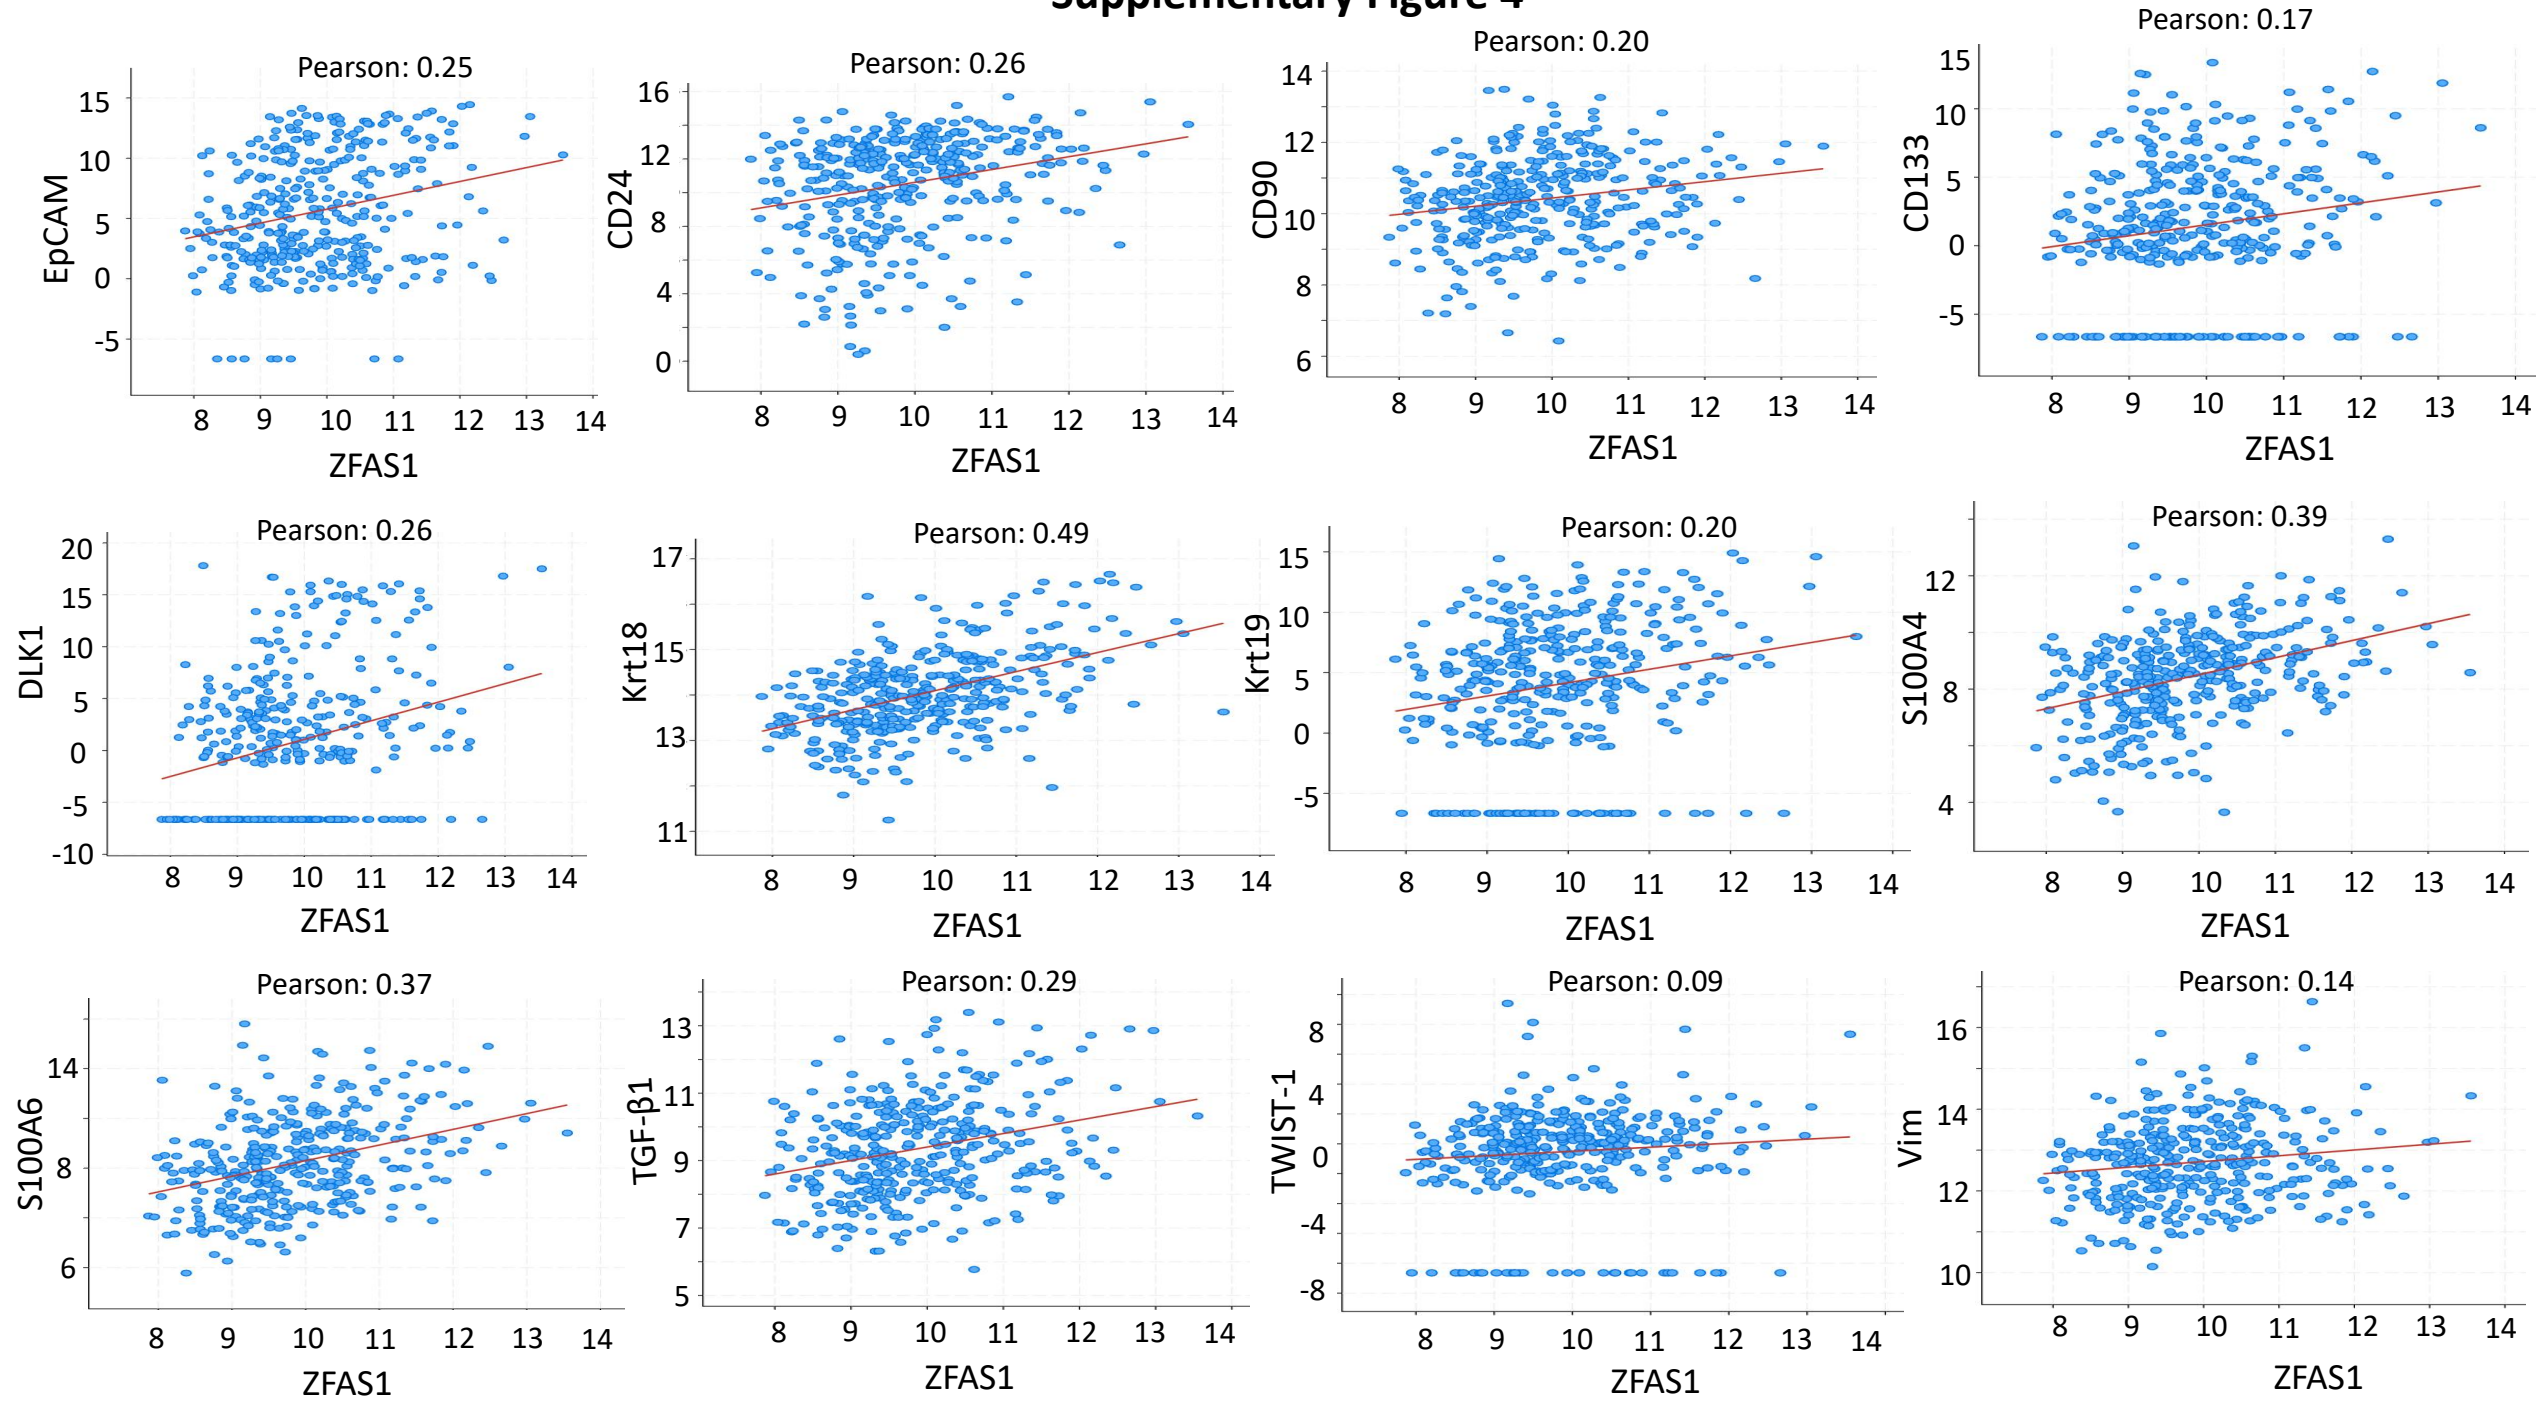

Supplement: 12943_2021_1473_MOESM2_ESM.pdf [file 12943_2021_1473_MOESM2_ESM.pdf]
